# Supplementary material
Source: publisher site journal article supplement (https://www.dovepress.com/article/481714)
Supplement: Supplementary file 1 [file get_supplementary_file.php]

**Supplementary information**

**
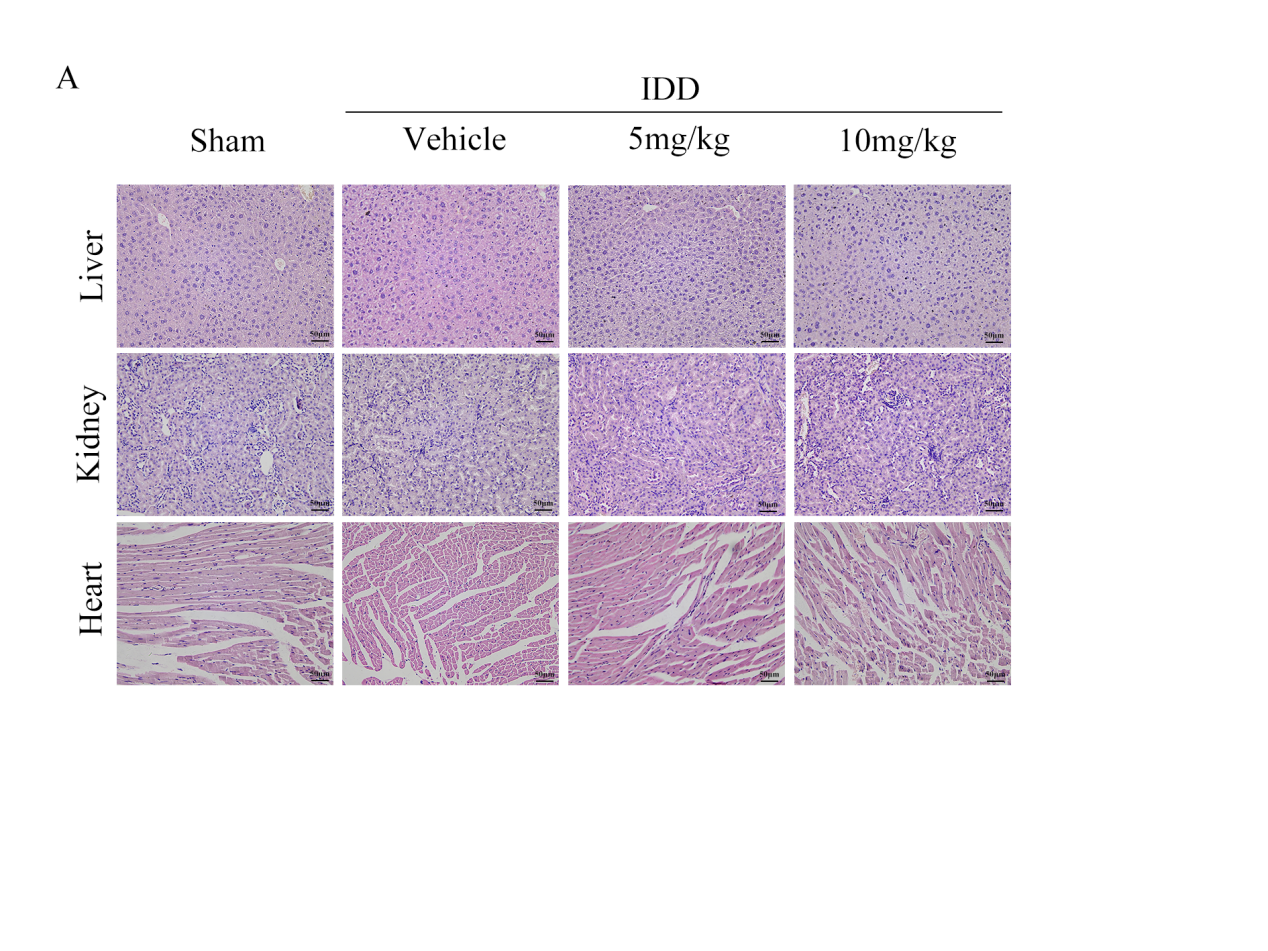
**

Supplementary figure 1: Td is not cytotoxic to vital organs in mice. (A) Hematoxylin and eosin staining of mouse heart, liver and kidney (n=6, Scale bar: 50 μm) .
